# Supplementary material for: A fluorescence color card for point-of-care testing (POCT) and its application in simultaneous detection
Source: Royal Society of Chemistry journal article supplement (doi:10.1039/d1an01035b), 2021-01-01
Supplement: d1an01035b1.pdf [file d1an01035b1.pdf]

## Supporting Information

### **A Fluorescent Color Card for Point-of-care Testing (POCT) and Its Application in Simultaneous Detection**

**Fan Lu<sup>a</sup>, Sisi Yang<sup>a</sup>, Yu Ning<sup>a</sup>, Fubing Wang<sup>b</sup>, Xinghu Ji<sup>a</sup>, Zhike He<sup>a,\*</sup>**

<sup>a</sup> College of Chemistry and Molecular Sciences, Wuhan University, Wuhan 430072,  
China

<sup>b</sup> Department of Laboratory Medicine, Zhongnan Hospital of Wuhan University,  
Wuhan 430071, China

\* Corresponding author. E-mail addresses: zhkhe@whu.edu.cn (Z. He); Tel: +86 27-  
68756557; fax: +86 27-68754067.

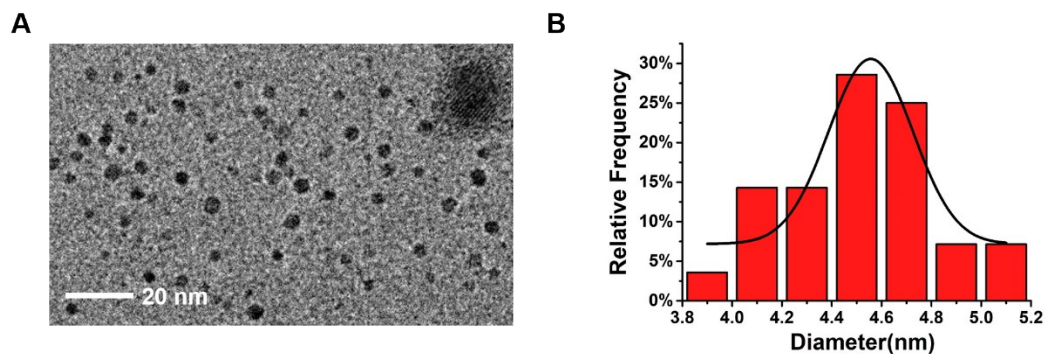

**Figure S1** (A) TEM image of the CdZnTeS QDs. (B) Statistical graph of particle size distribution of CdZnTeS QDs.

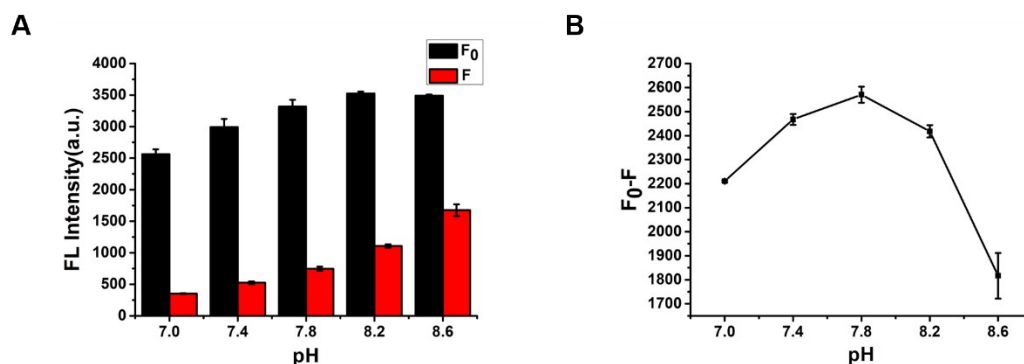

**Figure S2** (A) The histogram by plotting the fluorescence intensity of CdZnTeS QDs before and after reaction with glucose (500  $\mu\text{mol/L}$ ) versus different pH. (B) The point plot by plotting the decrease of fluorescence intensity versus different pH. GOx: 0.5 U/mL. The error bars were acquired by three repetitive experiments. Excitation wavelength: 340 nm.

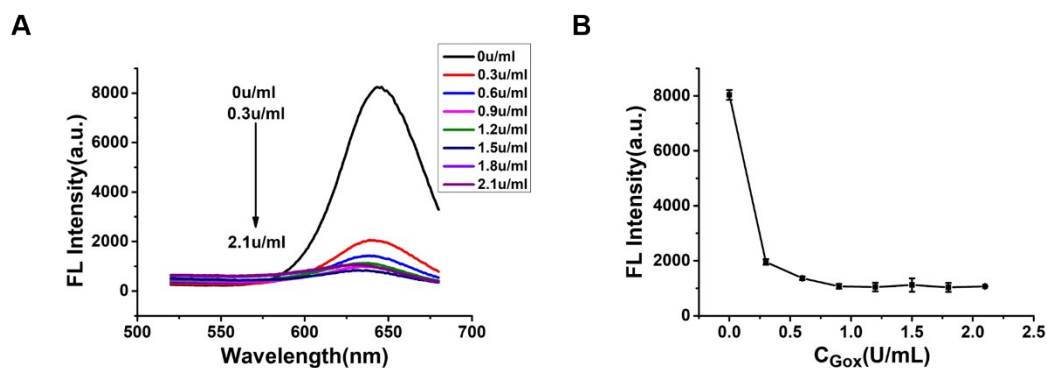

**Figure S3** (A) Fluorescence spectra of different concentrations of GOx (0.3 - 2.1 U/mL) addition to the mixed solution of CdZnTeS QDs and glucose. (B) The point plot of the fluorescence intensity versus different concentrations of GOx (0.3 - 2.1 U/mL). The error bars were acquired by three repetitive experiments. CdZnTeS QDs: 4.9 nmol/L. Glucose: 500  $\mu$ mol/L. Excitation wavelength: 340 nm.

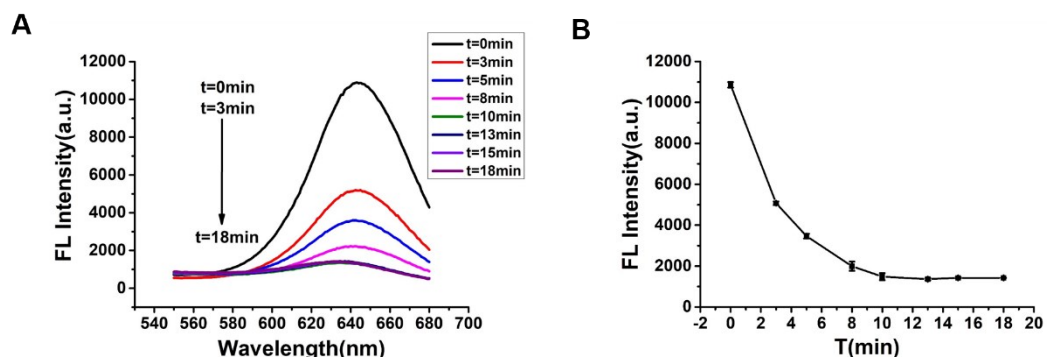

**Figure S4** (A) Fluorescence spectra of the mixed solution of CdZnTeS QDs and GOx for the detection of glucose within 0 - 16 min. (B) The point plot by plotting the fluorescence intensity versus reaction time. The error bars were acquired by three repetitive experiments. CdZnTeS QDs: GOx=4.9 nmol/L: 0.9 U/mL. Glucose: 500  $\mu$ mol/L. Excitation wavelength: 340 nm.

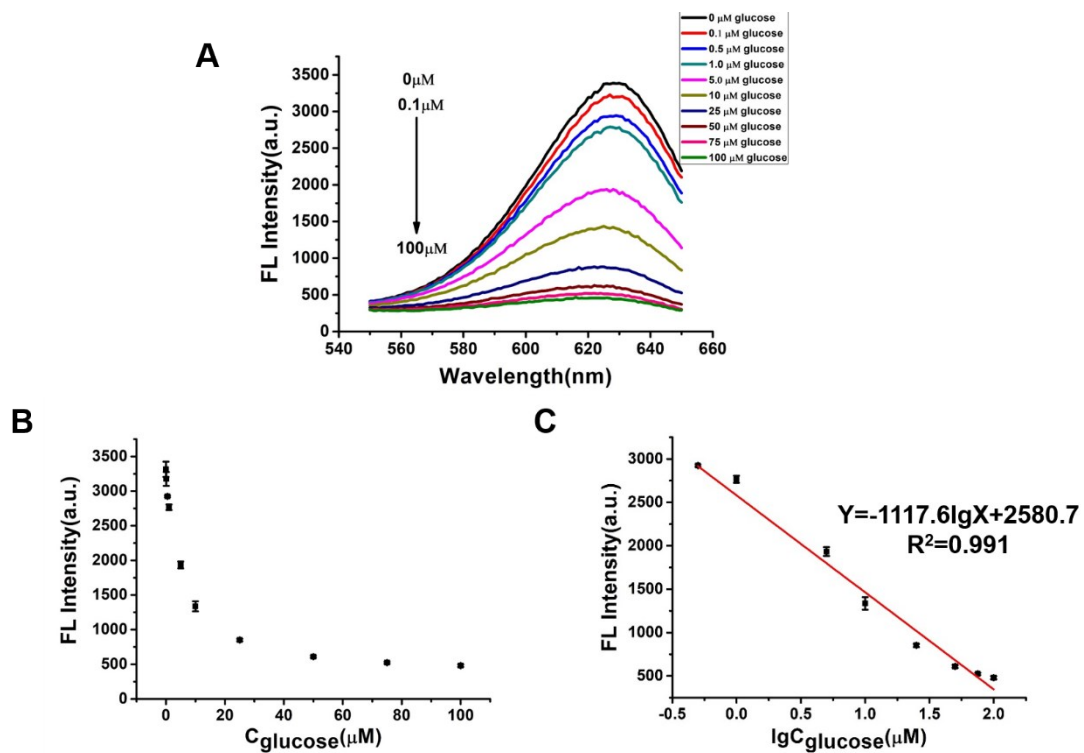

**Figure S5** (A) Fluorescence spectra of different concentrations of glucose (0.1 - 100  $\mu$ mol/L) addition to the mixed solution of CdZnTeS QDs and GOx. (B) The dot plot of the fluorescence intensity versus glucose concentration. (C) Calibration curve for glucose detection. The error bars were acquired by three repetitive experiments. CdZnTeS QDs: GOx=4.9 nmol/L: 0.9 U/mL.

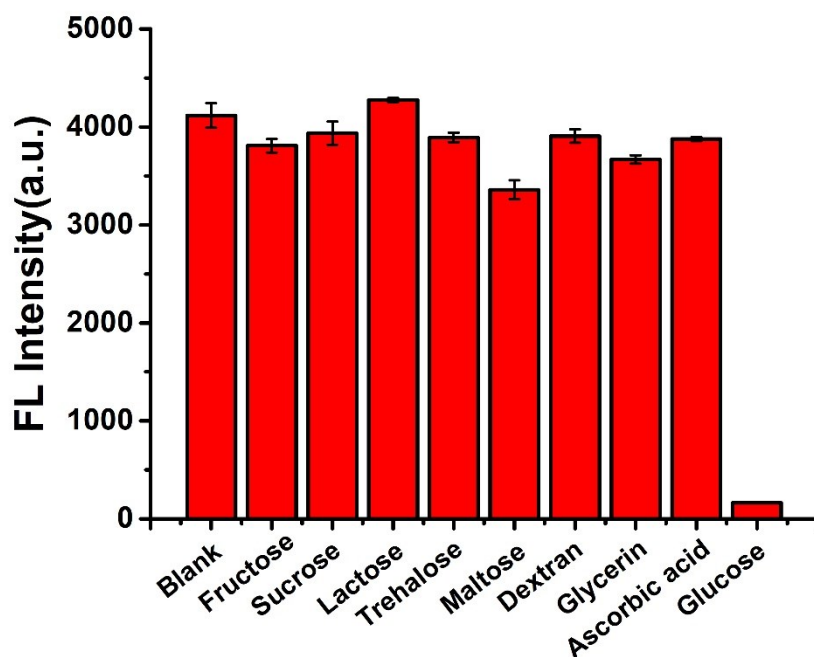

**Figure S6** The histogram by plotting the fluorescence intensity of the CdZnTeS QD solution versus different saccharides, glycerin and ascorbic acid (500  $\mu\text{mol/L}$  each). The error bars represent the standard deviations of three repetitive experiments. Excitation wavelength: 340 nm.

**Table S1** Comparison of the primary screen results of diabetes in this work with

clinic inspection of the Zhongnan Hospital.

| <b>Clinic samples (urine)</b> | <b>This method</b> | <b>Clinic results</b> | <b>Clinic samples (urine)</b> | <b>This method</b> | <b>Clinic results</b> |
|-------------------------------|--------------------|-----------------------|-------------------------------|--------------------|-----------------------|
| 1                             | *                  | *                     | 2                             | *                  | *                     |
| 3                             | +                  | +                     | 4                             | *                  | *                     |
| 5                             | *                  | *                     | 6                             | +                  | +                     |
| 7                             | +                  | *                     |                               |                    |                       |

"\*" expresses a healthy people and "+" expresses a patient with diabetes.

**Table S2** Comparison of the primary screen results of diabetes in this work with

clinic inspection of the Zhongnan Hospital.

| Clinic samples (serum) | This method | Clinic results | Clinic samples (serum) | This method | Clinic results |
|------------------------|-------------|----------------|------------------------|-------------|----------------|
| 1                      | *           | *              | 2                      | *           | +              |
| 3                      | *           | *              | 4                      | +           | +              |
| 5                      | *           | *              | 6                      | *           | *              |
| 7                      | *           | *              | 8                      | *           | *              |
| 9                      | *           | *              | 10                     | +           | +              |
| 11                     | *           | *              | 12                     | *           | *              |
| 13                     | *           | *              | 14                     | +           | +              |
| 15                     | *           | *              | 16                     | *           | *              |
| 17                     | *           | *              | 18                     | *           | *              |
| 19                     | *           | *              | 20                     | *           | *              |
| 21                     | *           | *              | 22                     | +           | *              |
| 23                     | *           | *              | 24                     | *           | *              |
| 25                     | *           | *              | 26                     | *           | *              |
| 27                     | *           | +              | 28                     | +           | +              |
| 29                     | *           | *              | 30                     | *           | *              |

"\*" expresses a healthy people and "+" expresses a patient with diabetes.

**Table S3** Comparison of the primary screen results of diabetes and hyperuricemia in

this work with clinic inspection of the Zhongnan Hospital.

---

| <b>Clinic<br/>samples<br/>(urine)</b> | <b>This<br/>method (G<br/>LU)</b> | <b>Clinic<br/>results (G<br/>LU)</b> | <b>Clinic<br/>samples<br/>(urine)</b> | <b>This<br/>method<br/>(UA)</b> | <b>Clinic<br/>results (U<br/>A)</b> |
|---------------------------------------|-----------------------------------|--------------------------------------|---------------------------------------|---------------------------------|-------------------------------------|
| 1                                     | *                                 | *                                    | 1                                     | *                               | *                                   |
| 2                                     | *                                 | *                                    | 2                                     | *                               | *                                   |
| 3                                     | +                                 | +                                    | 3                                     | +                               | +                                   |
| 4                                     | *                                 | *                                    | 4                                     | *                               | *                                   |
| 5                                     | *                                 | *                                    | 5                                     | *                               | *                                   |
| 6                                     | +                                 | +                                    | 6                                     | *                               | *                                   |
| 7                                     | +                                 | *                                    | 7                                     | +                               | +                                   |

---

"\*" expresses a healthy people and "+" expresses a patient with diabetes or hyperuricemia.

**Table S4** Comparison of material-based detection methods for glucose detection



| Material                                          | Method                         | Linear range ( $\mu\text{M}$ ) | LOD ( $\mu\text{M}$ ) | Reference |
|---------------------------------------------------|--------------------------------|--------------------------------|-----------------------|-----------|
| polymer QD-enzyme hybrids                         | fluorescence                   | 5 - 600                        | 5.0                   | 1         |
| glucose enzymatic electrode                       | electrochemical                | 100 - 1400                     | 40.0                  | 2         |
| PB-Au@MoS <sub>2</sub> NFs                        | colorimetric                   | 0 - 120                        | 3.0                   | 3         |
| 3D cloth-based GOD electrochemical chip           | electrochemical                | 50 - 1000                      | 50.0                  | 4         |
| Glucose oxidase-mediated sodium alginate gelation | visual distance-readout method | 1400 - 7000                    | 1400.0                | 5         |
| NiCo <sub>2</sub> S <sub>4</sub> microflowers     | colorimetric                   | 20 - 1000                      | 8.3                   | 6         |
| Alg@QDs-GOx MSs                                   | fluorescence                   | 100 - 1000                     | 1.1                   | This work |

## References

1. J. Yuan, N. Gaponik and A. Eychmuller, *Anal. Chem.*, 2012, **84**, 5047-5052.
2. L. Garcia-Carmona, A. Martin, J. R. Sempionatto, J. R. Moreto, M. C. Gonzalez, J. Wang and A. Escarpa, *Anal. Chem.*, 2019, **91**, 13883-13891.
3. L. Ma, J. Zhu, C. Wu, D. Li, X. Tang, Y. Zhang and C. An, *Spectroc. Acta Pt. A-Molec. Biomolec. Spectr.*, 2021, **259**, 119886.
4. L. Zheng, Y. Liu and C. Zhang, *Sens. Actuators, B*, 2021, **343**, 130131.
5. H. Zhang, X. Li, Z. M. Qian, S. Wang and F. Q. Yang, *Enzyme Microb. Technol.*, 2021, **148**, 109805.
6. Z. Huang, W. He, H. Shen, G. Han, H. Wang, P. Su, J. Song and Y. Yang, *Talanta*, 2021, **230**, 122337.
